# Supplementary material
Source: Royal Society of Chemistry journal article supplement (doi:10.1039/d6nj00867d)
Supplement: d6nj00867d1.pdf [file d6nj00867d1.pdf]

# Improving proton conductivity via crystallinity reduction and sulfonate ligand modification based on UiO-66

*Xinran Li<sup>a#</sup>, Yingying Ma<sup>b#</sup>, Xiaotian Zhang<sup>a</sup>, Jiajun Zhong<sup>a</sup>, Wenxuan Yan<sup>a</sup>, Jiefei Bai<sup>a</sup>, Yuxin Li<sup>a</sup>, Xiaofeng Zheng<sup>\*a</sup> and Zhe Liu<sup>\*a</sup>*

<sup>a</sup> Chemistry and Chemical Engineering, Qufu Normal University, Qufu 273165, Shandong, China.

<sup>b</sup> Yantai Chinese-English Senior High School, Yantai 265100, Shandong, China.

\* Address correspondence to Email:

xiaofengzheng2020@qfnu.edu.cn, xiaofengzheng004@163.com, and liuzhe@qfnu.edu.cn.

#Xinran Li and Yingying Ma contributed equally to this manuscript.

## Contents

|                                                                                                                     |  |
|---------------------------------------------------------------------------------------------------------------------|--|
| Table S1. Element Content of UiO-66-X and MOG-UiO-66-X (X = BSA, pSA). 1                                            |  |
| Table S2. Empirical Formula and Molecular Formulas of UiO-66-X and MOG-UiO-66-X (X = BSA, pSA).....1                |  |
| Table S3. T-Plot External Surface Area and Micropore Volume of UiO-66-X and MOG-UiO-66-X (X = BSA, pASA, pSA).....1 |  |
| Fig. S1. The most available pore size distribution: (a) UiO-66-X, (b) MOG-UiO-66-X. ....2                           |  |
| Fig. S2. Conductivity of (a-c) UiO-66-X and (d-f) MOG-UiO-66-X.....3                                                |  |
| Fig. S3. Activation energies for (a-c) UiO-66-X and (d-f) MOG-UiO-66-X.....4                                        |  |
| Fig. S4. Stability study for (a, b) UiO-66-X and (c, d) MOG-UiO-66-X at different pH values..... 5                  |  |
| Table S4 $\sigma$ values ( $\text{S}\cdot\text{cm}^{-1}$ ) of UiO-66-X and MOG-UiO-66-X at 353 K.....6              |  |
| Table S5. Activation energies ( $E_a$ ) of UiO-66-X.....6                                                           |  |
| Table S6. Activation energies ( $E_a$ ) of MOG-UiO-66-X.....6                                                       |  |

Table S1. Element Content of UiO-66-X and MOG-UiO-66-X (X = -BSA, -pSA)

| UiO-66-X       | Element Content/%(Experimental/Theoretical) |              |            |            |             |
|----------------|---------------------------------------------|--------------|------------|------------|-------------|
|                | Zr                                          | C            | H          | N          | S           |
| UiO-66         | 25.71/27.64                                 | 36.96/33.96  | 4.195/3.26 | 5.09/2.83  | 0/0         |
| UiO-66-BSA     | 32.51/38.25                                 | 27.68/28.18  | 3.735/3.46 | 4.195/2.94 | 0.195/0.22  |
| UiO-66-pSA     | 26.87/30.58                                 | 30.125/30.20 | 3.805/3.49 | 3.89/3.91  | 0.515/0.537 |
| MOG-UiO-66     | 21.95/25.6                                  | 36.005/33.7  | 4.1/3.56   | 3.46/2.62  | 0/0         |
| MOG-UiO-66-BSA | 23.88/27.2                                  | 31.35/31.2   | 4.105/3.0  | 4.97/4.88  | 0.33/0.32   |
| MOG-UiO-66-pSA | 22.70/25.60                                 | 27.975/26.40 | 4.085/4.90 | 4.86/5.24  | 1.32/1.20   |

Table S2. Empirical Formula and Molecular Formulas of UiO-66-X and MOG-UiO-66-X (X = -BSA, -pASA, -pSA)

| UiO-66-X        | Empirical Formula                                                                                | Molecular Formula                                                                                                                    |
|-----------------|--------------------------------------------------------------------------------------------------|--------------------------------------------------------------------------------------------------------------------------------------|
| UiO-66          | Zr <sub>6</sub> C <sub>56</sub> H <sub>72</sub> N <sub>4</sub> O <sub>42</sub>                   | Zr <sub>6</sub> O <sub>4</sub> (OH) <sub>4</sub> (BDC) <sub>5</sub> (OH) <sub>2</sub> ·4DMF·4H <sub>2</sub> O                        |
| UiO-66-BSA      | Zr <sub>6</sub> C <sub>34</sub> H <sub>50</sub> N <sub>3</sub> O <sub>32</sub> S <sub>0.1</sub>  | Zr <sub>6</sub> O <sub>4</sub> (OH) <sub>4</sub> (BDC) <sub>3</sub> (BSA) <sub>0.1</sub> (OH) <sub>6</sub> ·3DMF·3H <sub>2</sub> O   |
| UiO-66-pASA     | Zr <sub>6</sub> C <sub>52</sub> H <sub>47</sub> N <sub>3</sub> SO <sub>39</sub>                  | Zr <sub>6</sub> O <sub>4</sub> (OH) <sub>4</sub> (BDC) <sub>5</sub> (pASA)·2DMF·2H <sub>2</sub> O                                    |
| UiO-66-pSA      | Zr <sub>6</sub> C <sub>51</sub> H <sub>77</sub> N <sub>6</sub> O <sub>44</sub> S <sub>0.33</sub> | Zr <sub>6</sub> O <sub>4</sub> (OH) <sub>4</sub> (BDC) <sub>3.5</sub> (pSA) <sub>0.3</sub> (OH) <sub>4</sub> ·5DMF·2H <sub>2</sub> O |
| MOG-UiO-66      | Zr <sub>6</sub> C <sub>60</sub> H <sub>76</sub> N <sub>4</sub> O <sub>46</sub>                   | /                                                                                                                                    |
| MOG-UiO-66-BSA  | Zr <sub>6</sub> C <sub>52</sub> H <sub>99</sub> N <sub>7</sub> O <sub>48</sub> S <sub>0.2</sub>  | /                                                                                                                                    |
| MOG-UiO-66-pASA | Zr <sub>6</sub> C <sub>56</sub> H <sub>73</sub> N <sub>7</sub> SO <sub>35</sub>                  | /                                                                                                                                    |
| MOG-UiO-66-pSA  | Zr <sub>6</sub> C <sub>47</sub> H <sub>104</sub> N <sub>8</sub> S <sub>0.8</sub> O <sub>49</sub> | /                                                                                                                                    |

Note: The results of UiO-66-pASA and MOG-UiO-66-pASA are derived by analogy from other materials.

Table S3. T-Plot External Surface Area and Micropore Volume of UiO-66-X and MOG-UiO-66-X (X = -BSA, -pASA, -pSA)

| UiO-66-X        | T-Plot External Surface Area(cm <sup>2</sup> /g) | T-Plot Micropore Volume(cm <sup>3</sup> /g) |
|-----------------|--------------------------------------------------|---------------------------------------------|
| UiO-66          | 341.15                                           | 0.045381                                    |
| UiO-66-BSA      | 215.76                                           | 0                                           |
| UiO-66-pASA     | 364.74                                           | 0                                           |
| UiO-66-pSA      | 162.05                                           | 0.001861                                    |
| MOG-UiO-66      | 461.69                                           | 0                                           |
| MOG-UiO-66-BSA  | 569.48                                           | 0                                           |
| MOG-UiO-66-pASA | 346.83                                           | 0                                           |
| MOG-UiO-66-pSA  | 489.31                                           | 0                                           |

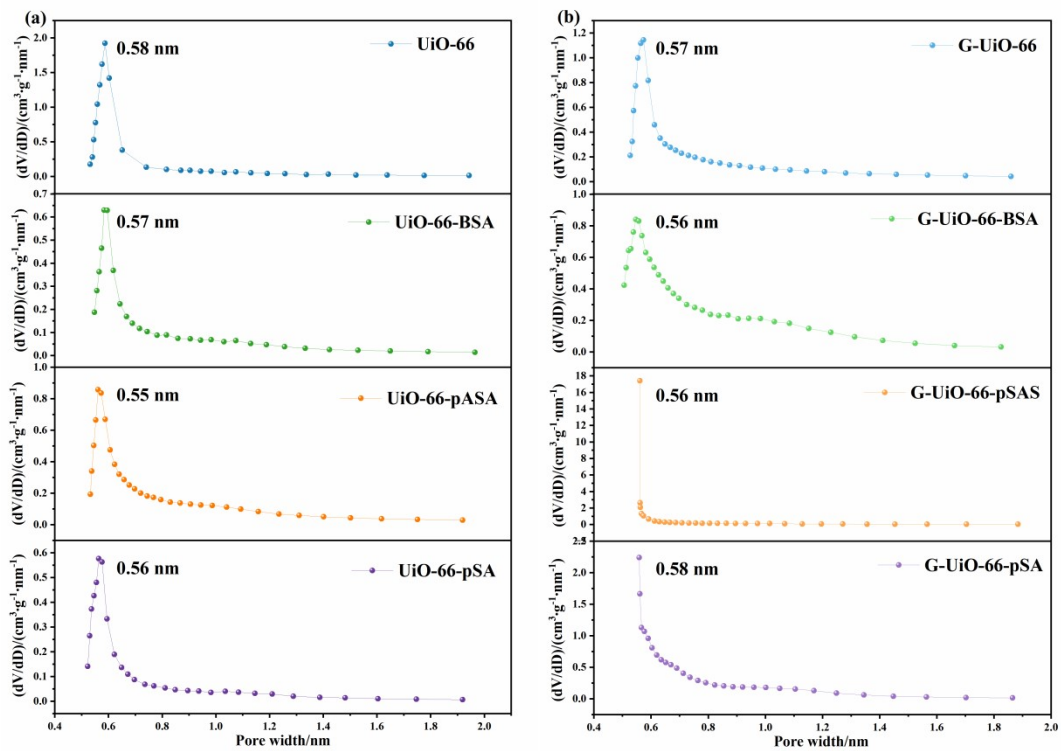

Fig. S1. The most available pore size distribution: (a) UiO-66-X, (b) MOG-UiO-66-X

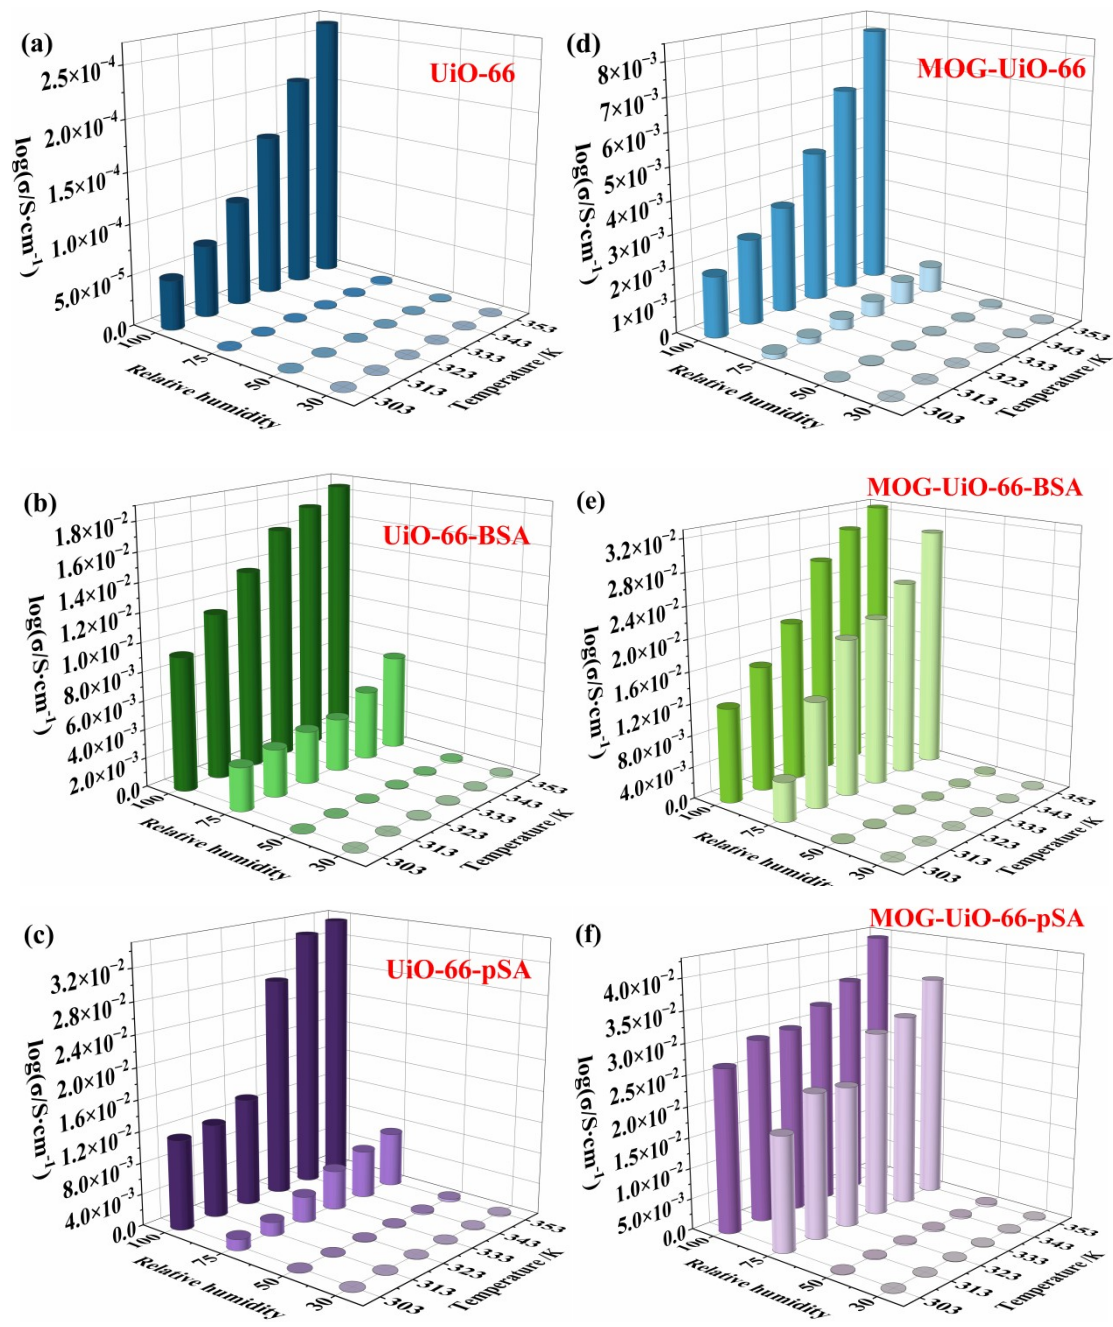

Fig. S2. Conductivity of (a-c) UiO-66-X and (d-f) MOG-UiO-66-X.

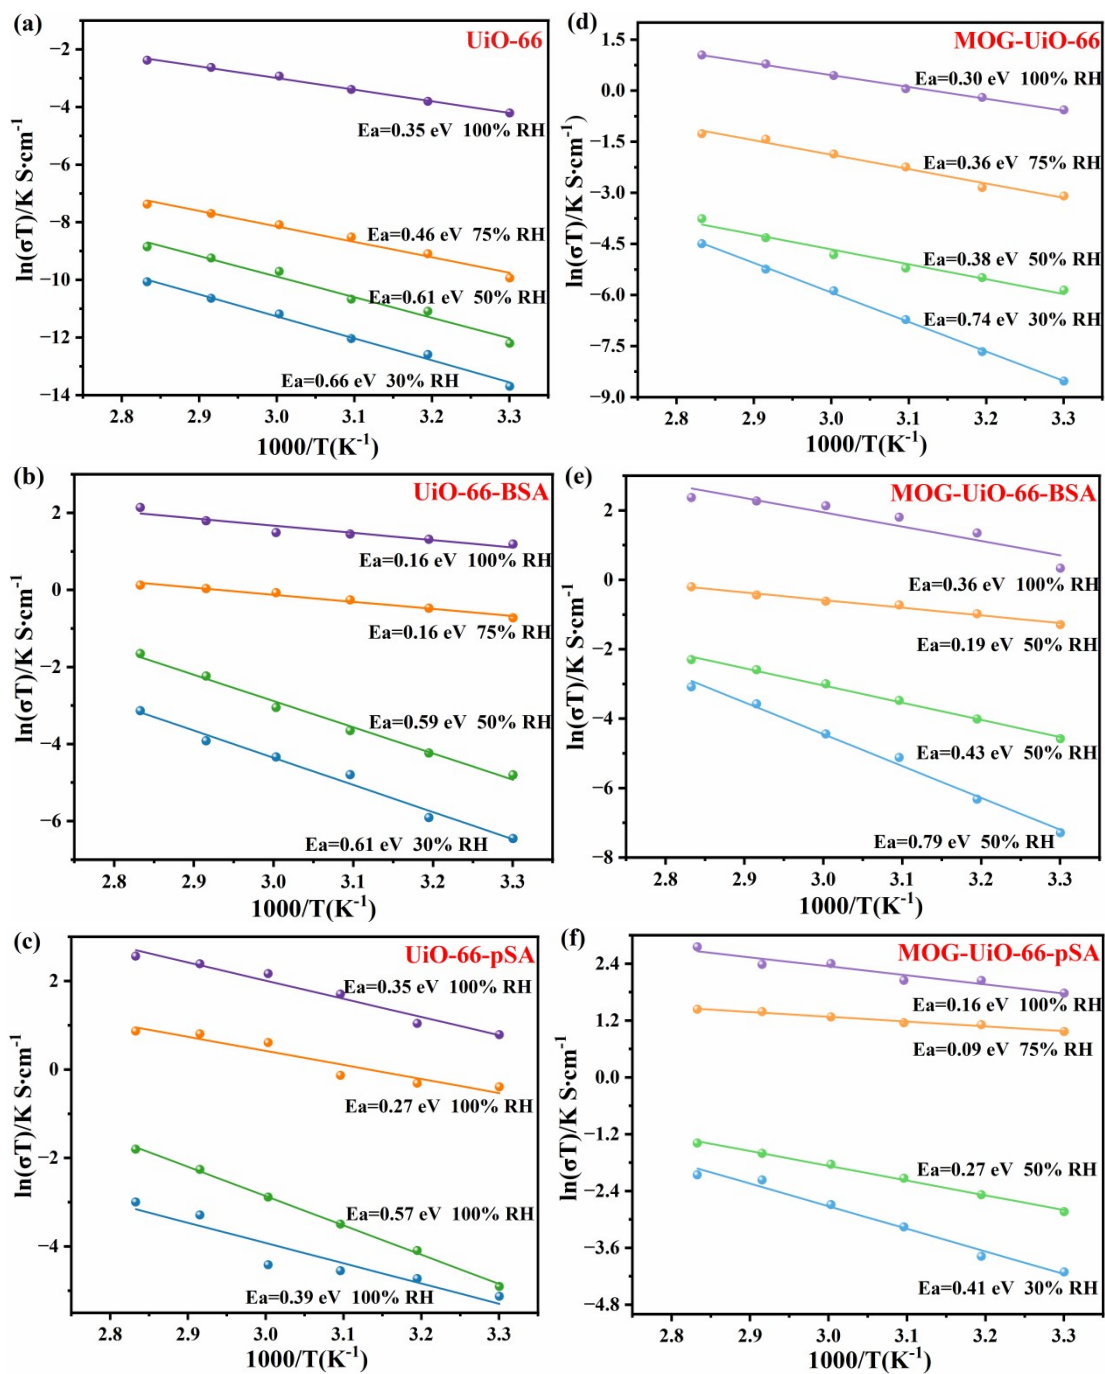

Fig. S3. Activation energies for (a-c) UiO-66-X and (d-f) MOG-UiO-66-X.

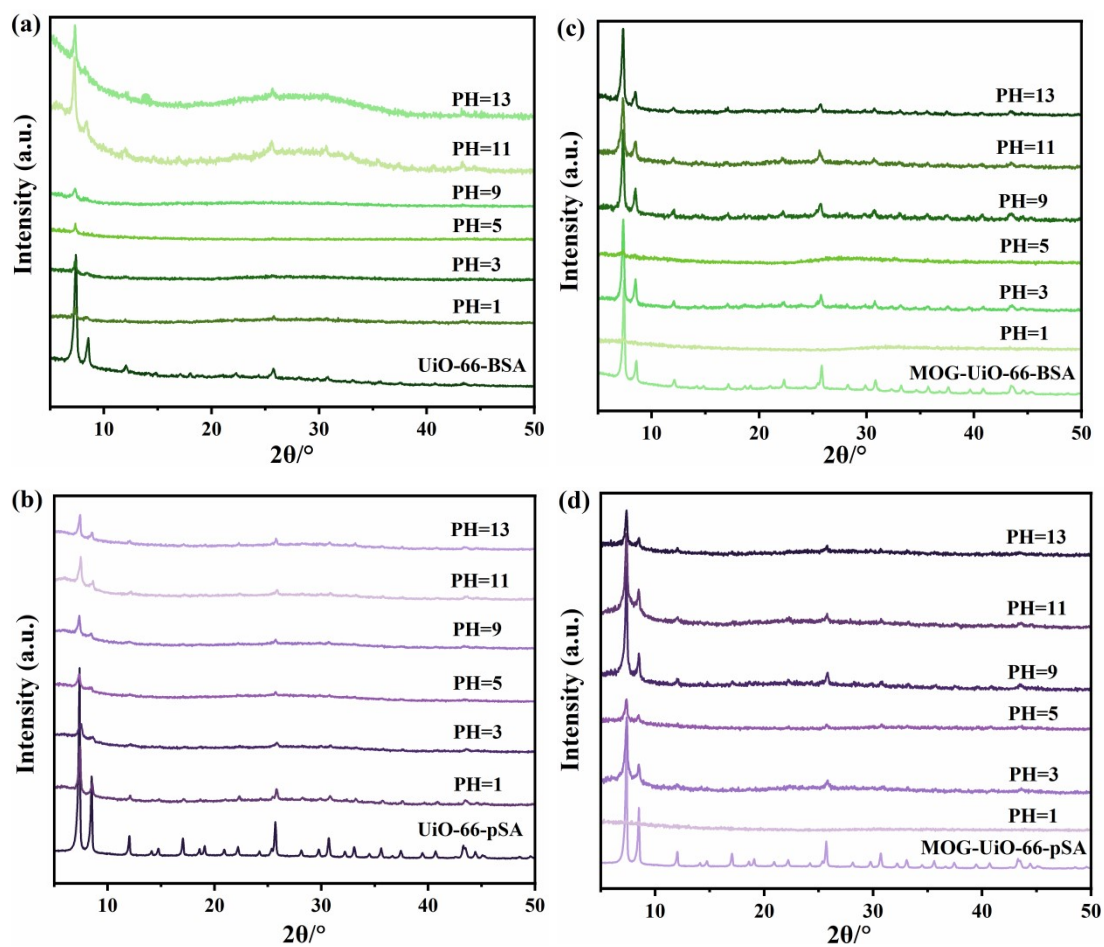

Fig. S4. Stability study for (a, b) UiO-66-X and (c, d) MOG-UiO-66-X at different pH values.

Table S4  $\sigma$  values ( $\text{S}\cdot\text{cm}^{-1}$ ) of UiO-66-X and MOG-UiO-66-X at 353 K.

| Materials       | 30% RH                | 50% RH                | 75% RH                | 100% RH               |
|-----------------|-----------------------|-----------------------|-----------------------|-----------------------|
| UiO-66          | $1.21 \times 10^{-7}$ | $4.04 \times 10^{-7}$ | $1.78 \times 10^{-6}$ | $2.62 \times 10^{-4}$ |
| UiO-66-BSA      | $1.23 \times 10^{-4}$ | $1.46 \times 10^{-4}$ | $6.67 \times 10^{-3}$ | $1.85 \times 10^{-2}$ |
| UiO-66-pASA     | $2.69 \times 10^{-4}$ | $3.21 \times 10^{-3}$ | $2.57 \times 10^{-2}$ | $4.56 \times 10^{-2}$ |
| UiO-66-pSA      | $1.42 \times 10^{-4}$ | $3.49 \times 10^{-4}$ | $7.07 \times 10^{-3}$ | $3.44 \times 10^{-2}$ |
| MOG-UiO-66      | $3.16 \times 10^{-5}$ | $6.57 \times 10^{-5}$ | $8.01 \times 10^{-4}$ | $8.06 \times 10^{-3}$ |
| MOG-UiO-66-BSA  | $1.30 \times 10^{-4}$ | $2.84 \times 10^{-4}$ | $3.04 \times 10^{-2}$ | $3.27 \times 10^{-2}$ |
| MOG-UiO-66-pASA | $2.96 \times 10^{-3}$ | $7.29 \times 10^{-3}$ | $6.48 \times 10^{-2}$ | $9.38 \times 10^{-2}$ |
| MOG-UiO-66-pSA  | $1.83 \times 10^{-4}$ | $3.57 \times 10^{-4}$ | $3.65 \times 10^{-2}$ | $4.22 \times 10^{-2}$ |

Table S5. Activation energies ( $E_a$ ) of UiO-66-X.

| RHs  | UiO-66      | UiO-66-BSA | UiO-66-pASA | UiO-66-pSA |
|------|-------------|------------|-------------|------------|
|      | $E_a/$ (eV) |            |             |            |
| 30%  | 0.66        | 0.61       | 0.30        | 0.39       |
| 50%  | 0.61        | 0.59       | 0.29        | 0.57       |
| 75%  | 0.46        | 0.16       | 0.15        | 0.27       |
| 100% | 0.35        | 0.16       | 0.20        | 0.35       |

Table S6. Activation energies ( $E_a$ ) of MOG-UiO-66-X.

| RHs  | MOG-UiO-66  | MOG-UiO-66-BSA | MOG-UiO-66-pASA | MOG-UiO-66-pSA |
|------|-------------|----------------|-----------------|----------------|
|      | $E_a/$ (eV) |                |                 |                |
| 30%  | 0.74        | 0.79           | 0.63            | 0.41           |
| 50%  | 0.38        | 0.43           | 0.35            | 0.27           |
| 75%  | 0.36        | 0.19           | 0.11            | 0.09           |
| 100% | 0.30        | 0.36           | 0.18            | 0.16           |
